# Supplementary material for: Recombinant measles virus vaccine rMV-Hu191 exerts an oncolytic effect on esophageal squamous cell carcinoma via caspase-3/GSDME-mediated pyroptosis
Source: PubMed Central journal article supplement (PMC10195838; doi:10.1038/s41420-023-01466-2), 2023-05-19

Fig S1

A.

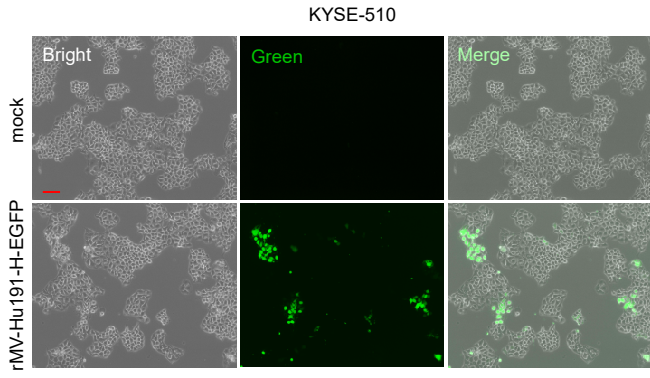

B.

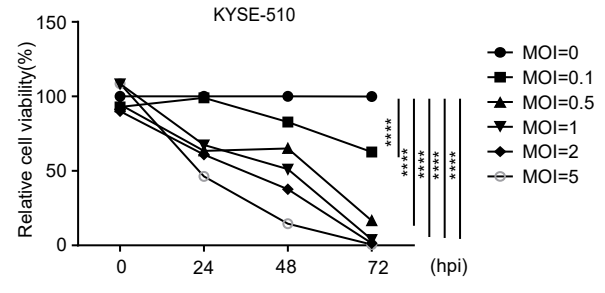

C.

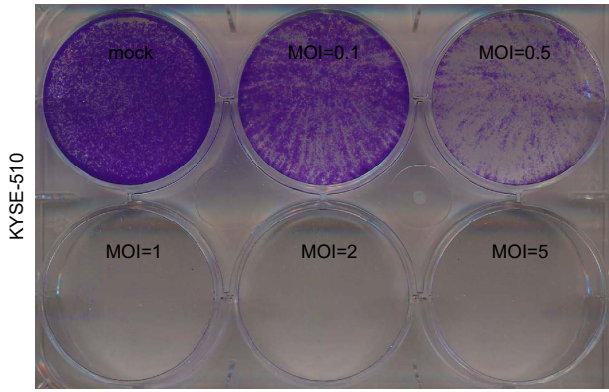

D.

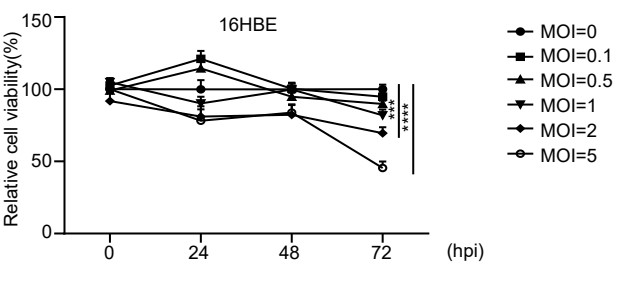

Fig S2

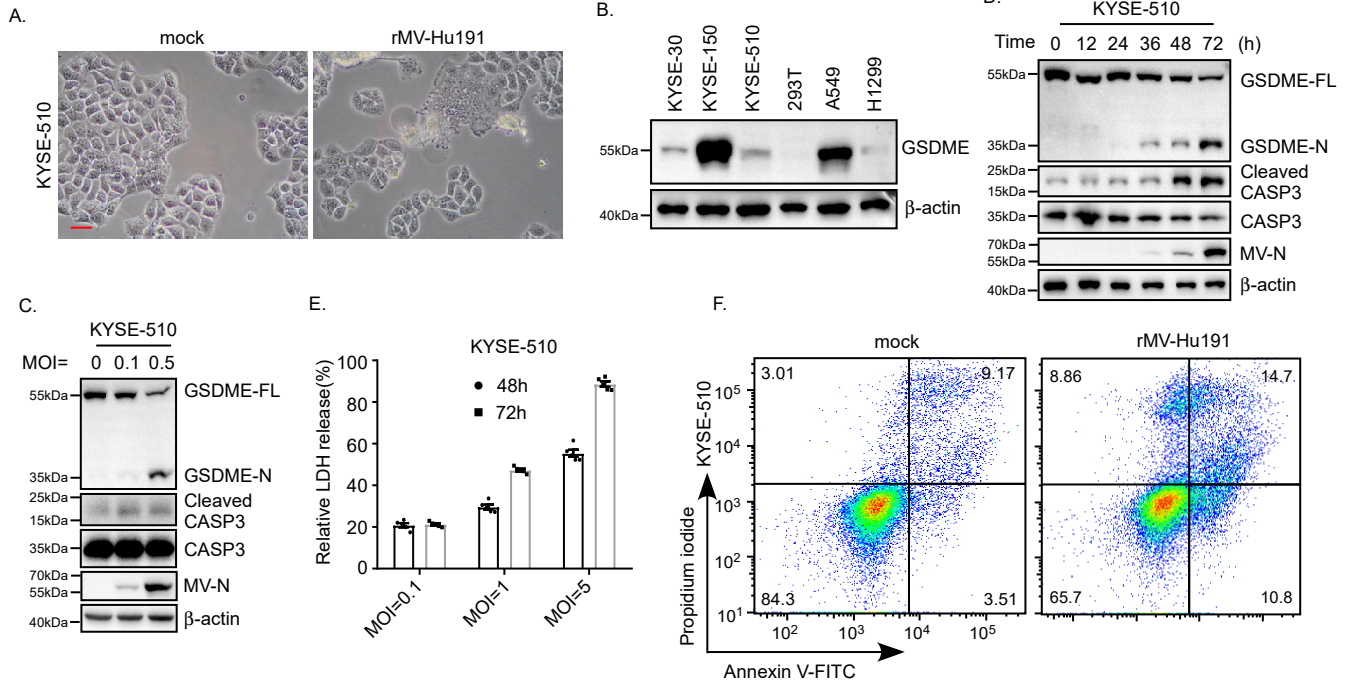



Fig S3

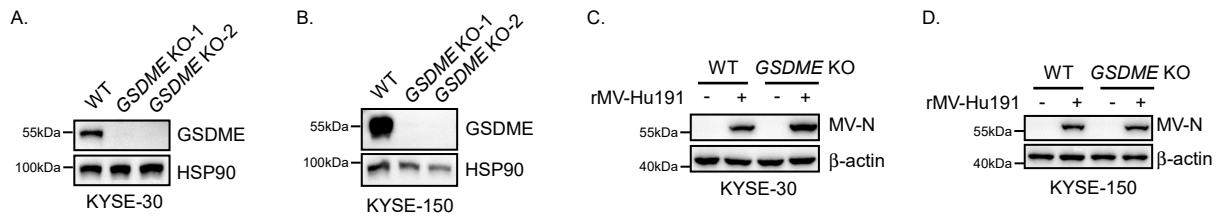

Fig S4

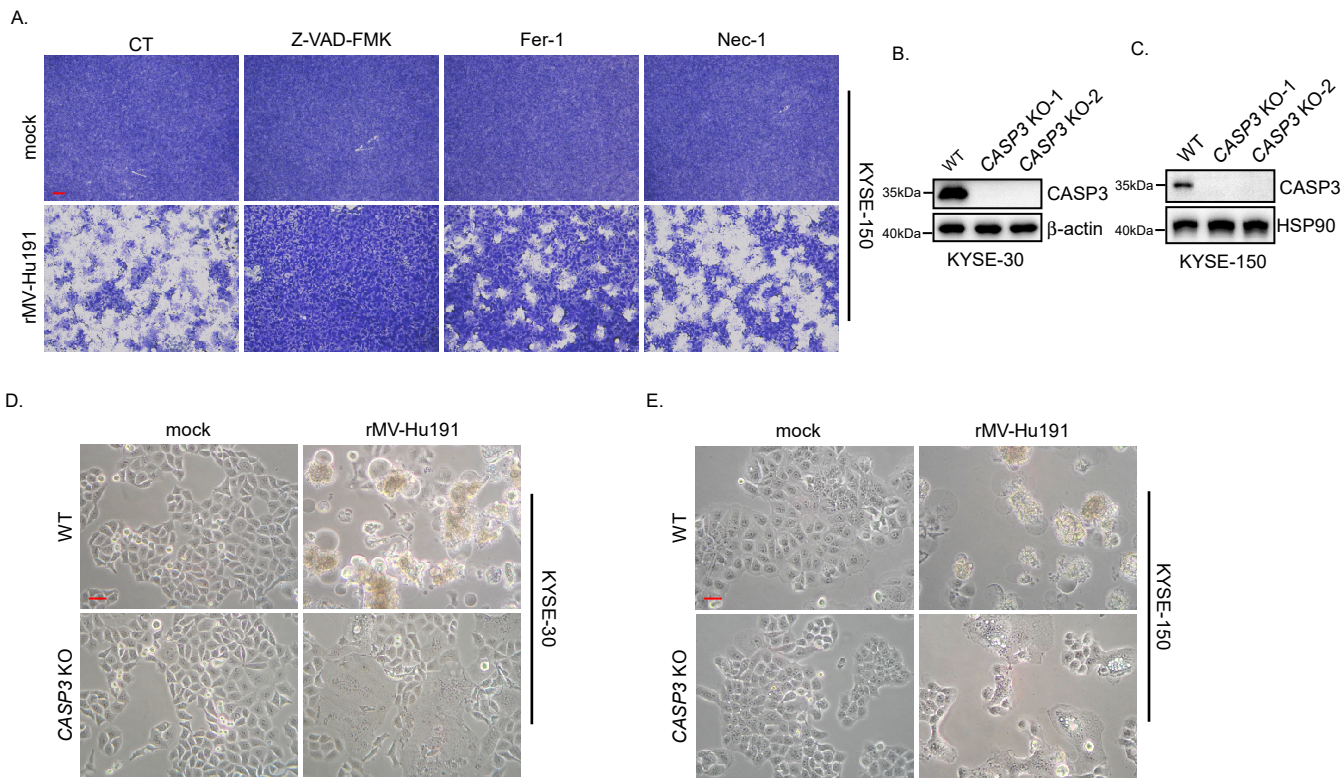

Fig S5

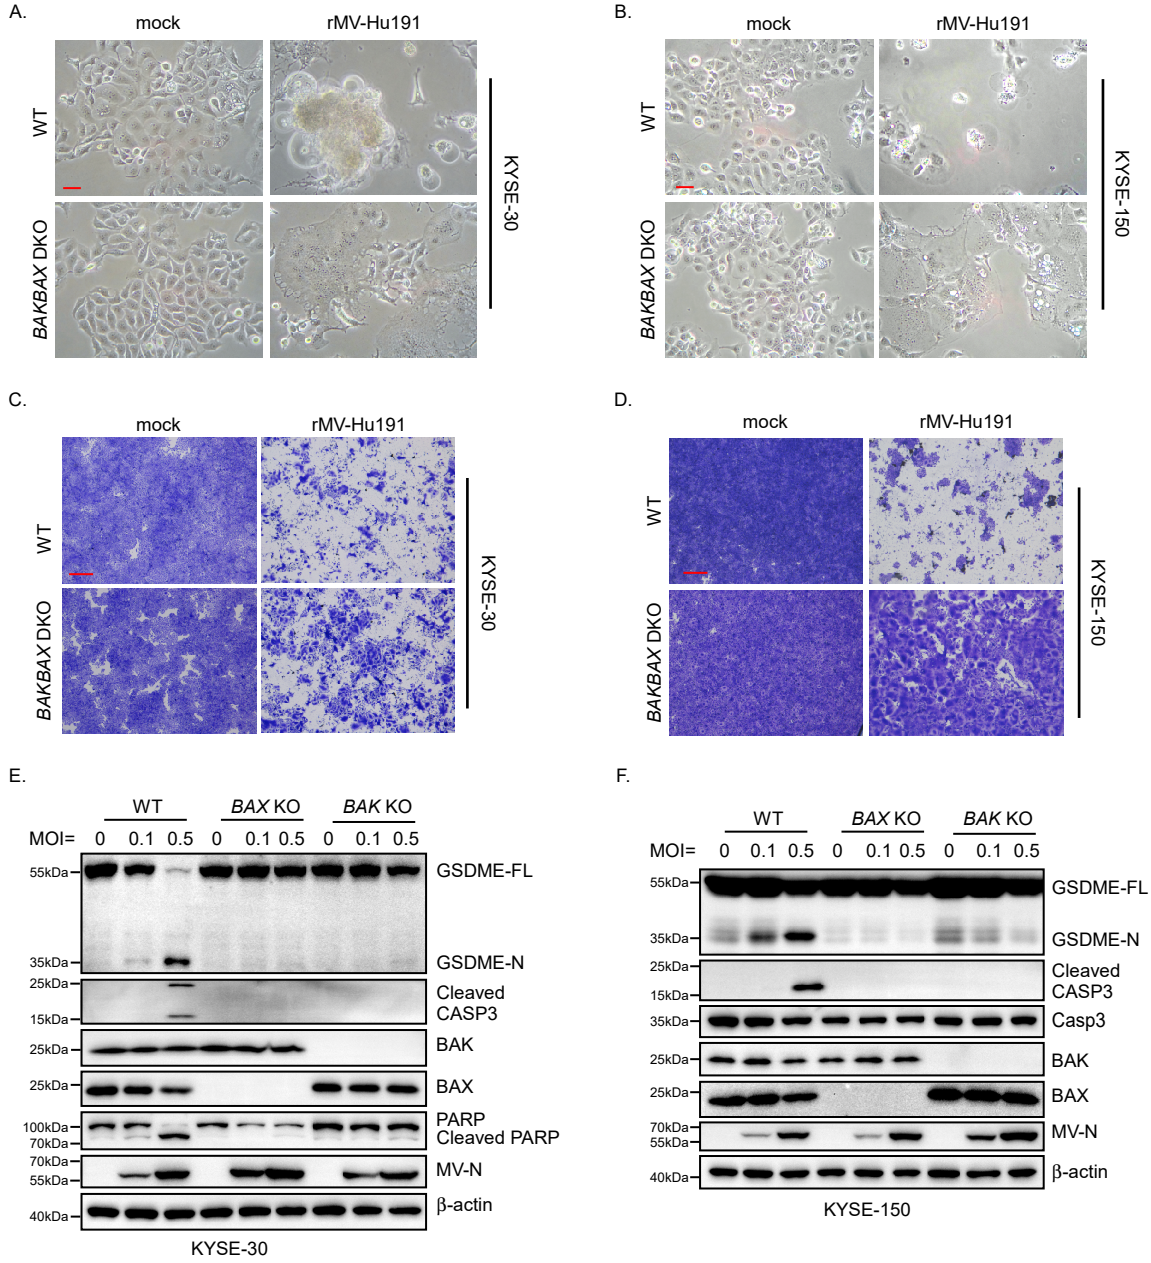

Fig S6

A.

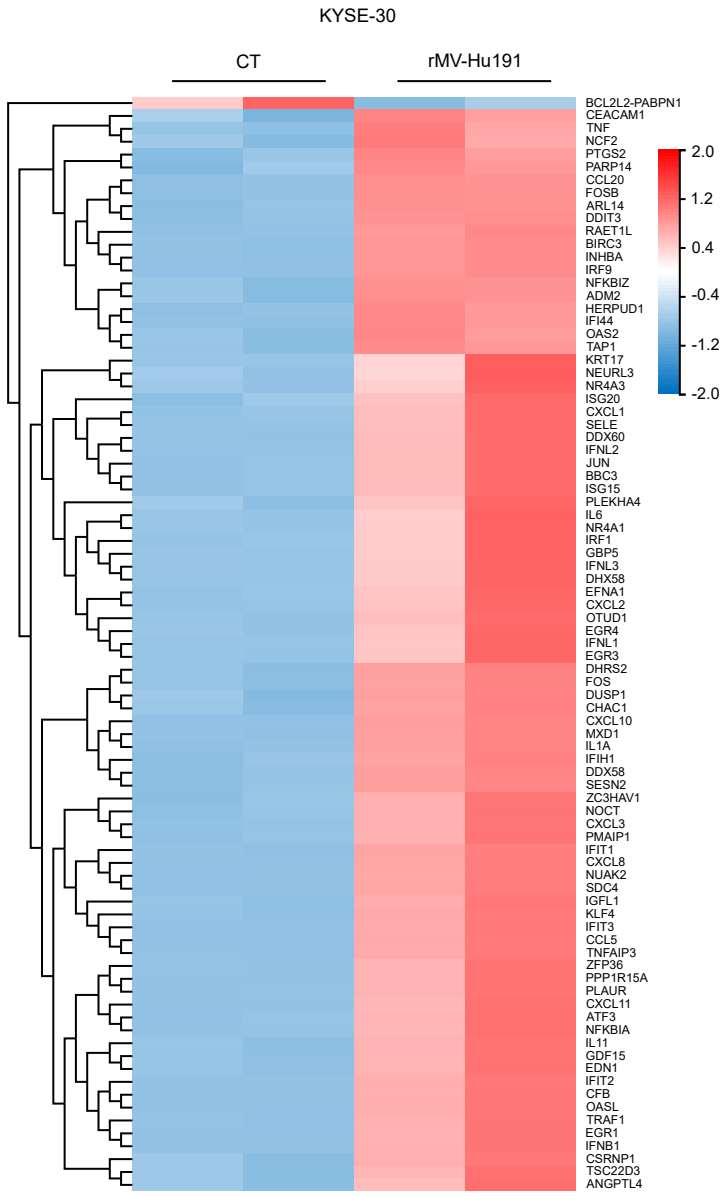

B.

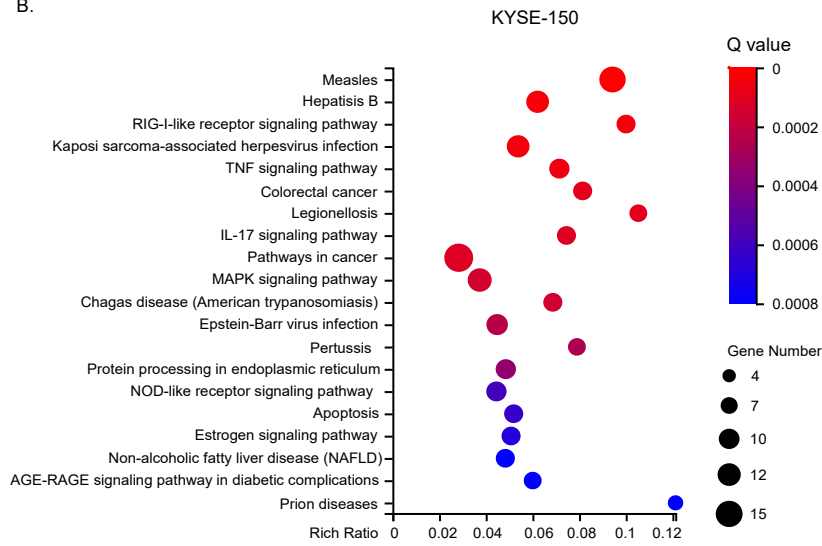

C.

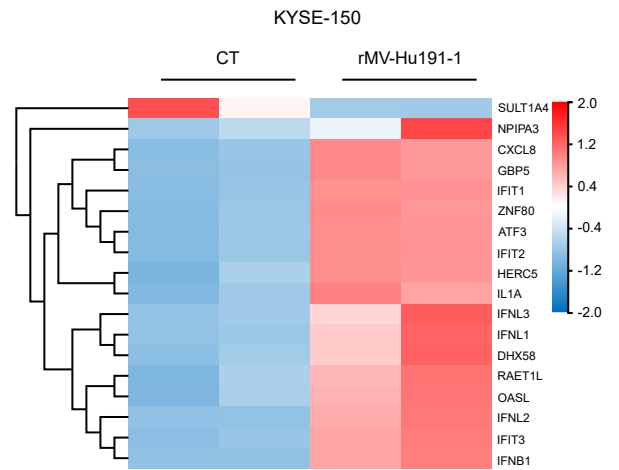

Supplement: 41420_2023_1466_MOESM2_ESM.pdf [file 41420_2023_1466_MOESM2_ESM.pdf]
