# Supplementary material for: Recombinant measles virus vaccine rMV-Hu191 exerts an oncolytic effect on esophageal squamous cell carcinoma via caspase-3/GSDME-mediated pyroptosis
Source: PubMed Central journal article supplement (PMC10195838; doi:10.1038/s41420-023-01466-2), 2023-05-19

Fig 2

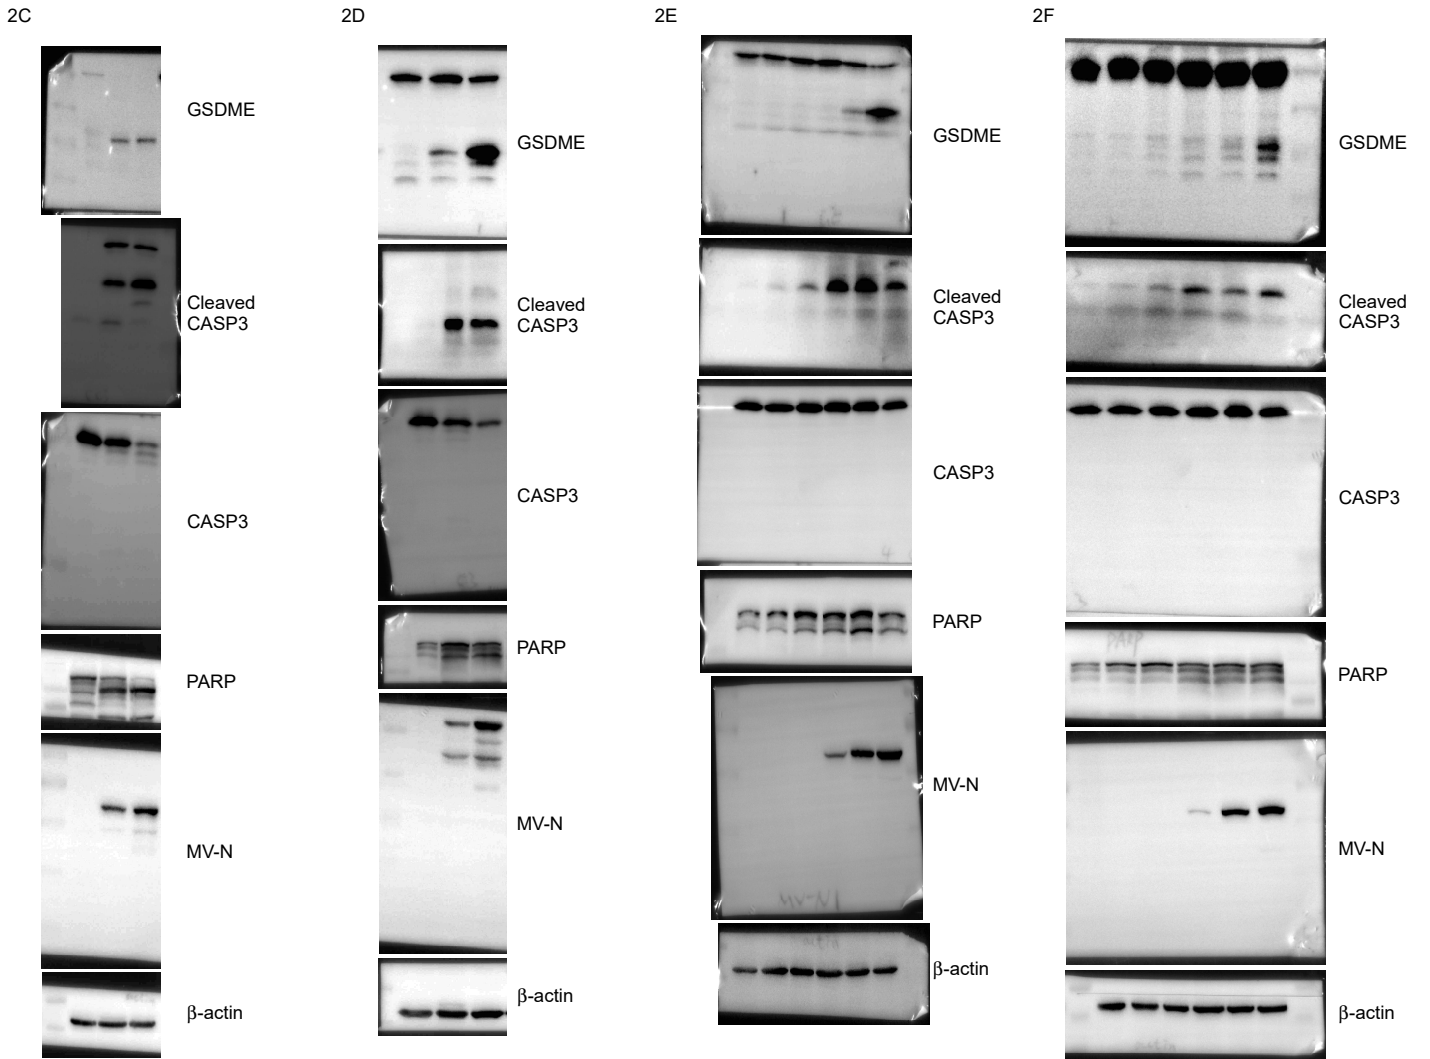

Fig4

4A

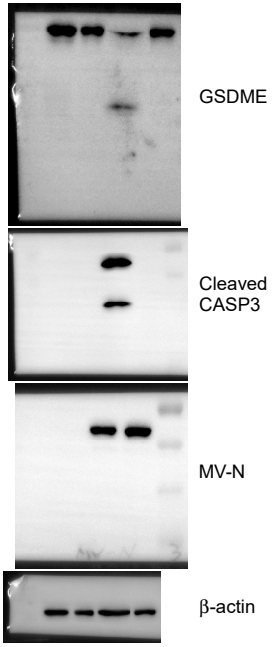

4B

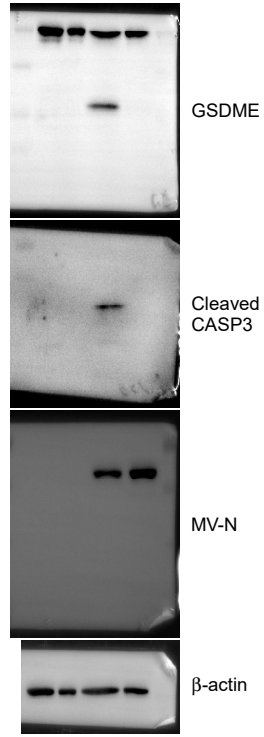

4I

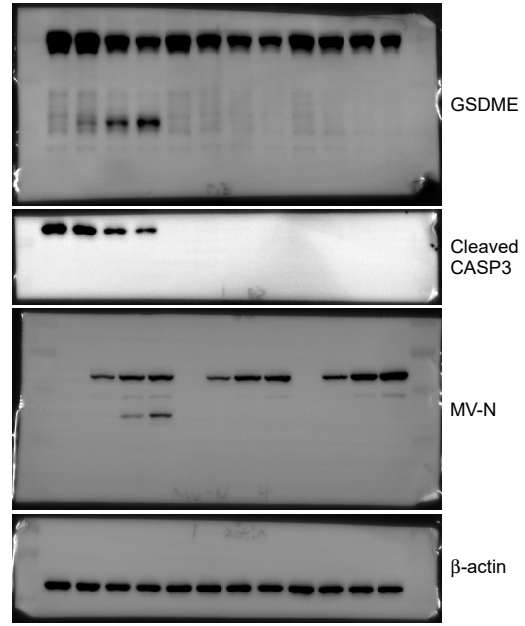

4J

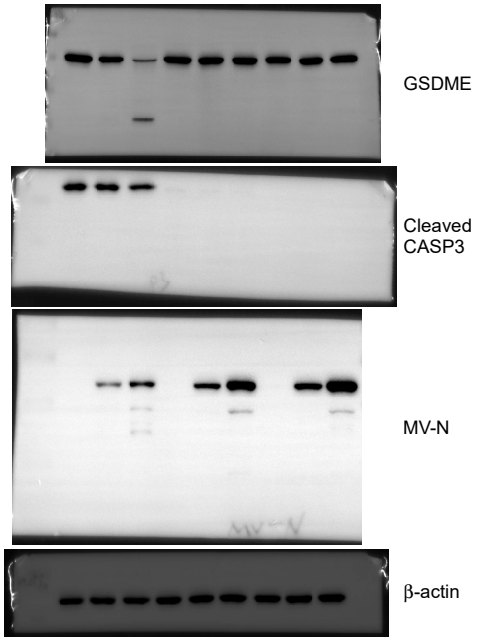



Fig5

5G

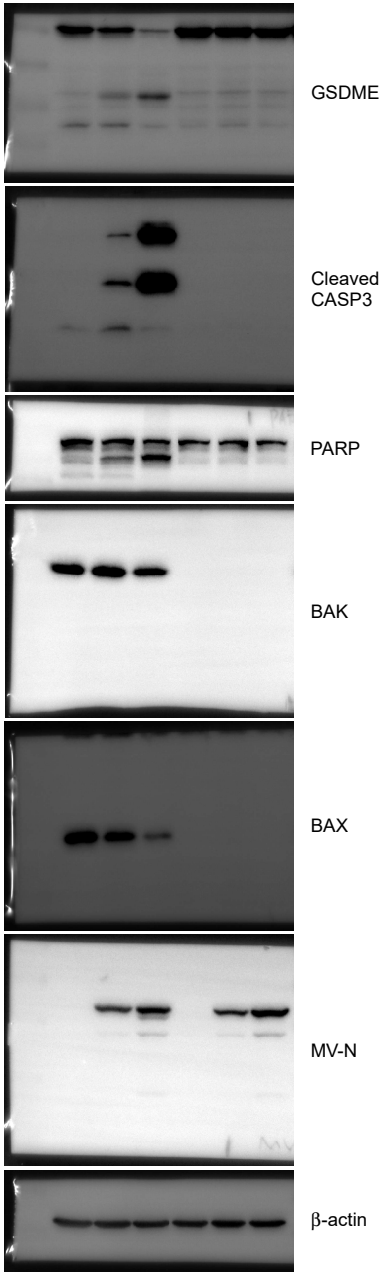

5H

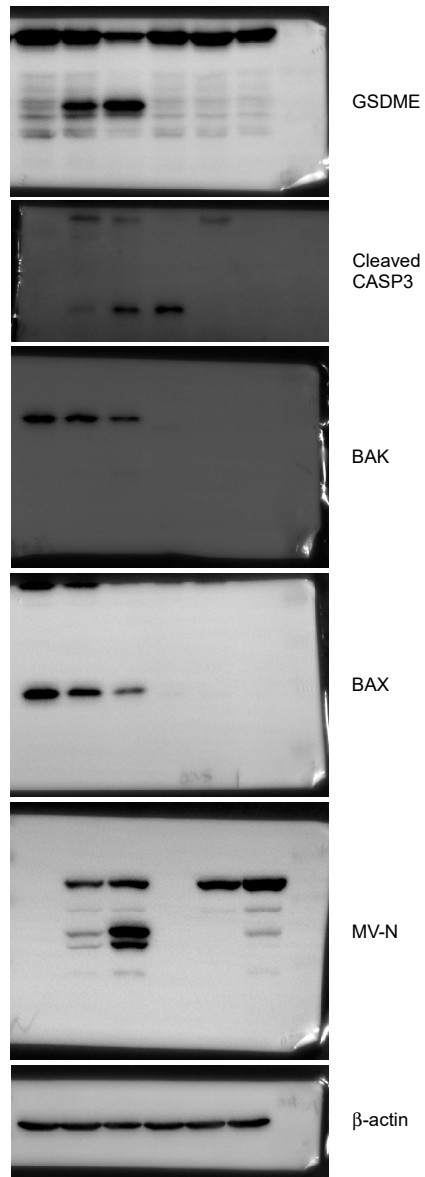

Fig6

6G

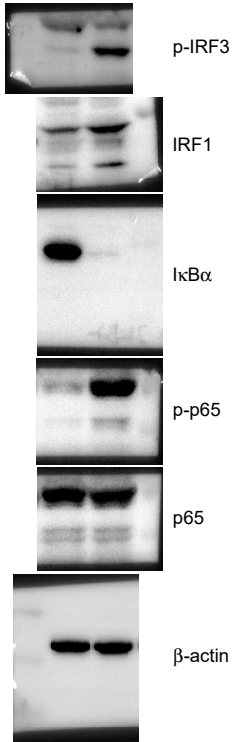

6H

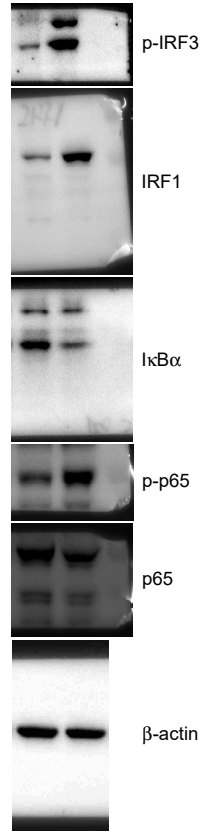

Fig7

7K

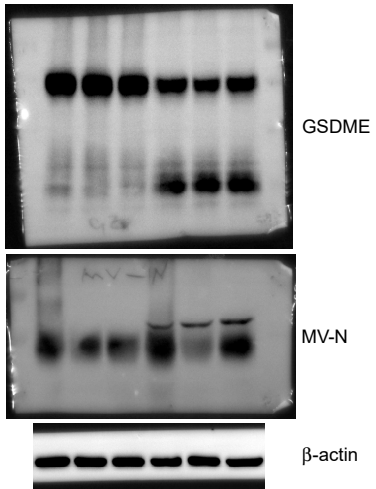

Supplement: 41420_2023_1466_MOESM3_ESM.pdf [file 41420_2023_1466_MOESM3_ESM.pdf]
