# Supplementary material for: Recombinant measles virus vaccine rMV-Hu191 exerts an oncolytic effect on esophageal squamous cell carcinoma via caspase-3/GSDME-mediated pyroptosis
Source: PubMed Central journal article supplement (PMC10195838; doi:10.1038/s41420-023-01466-2), 2023-05-19

Fig S2

S2B

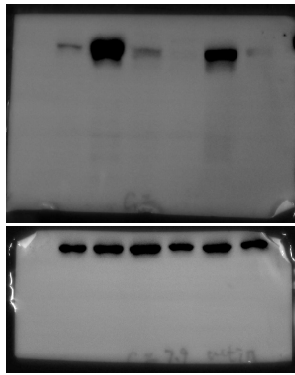

GSDME

$\beta$ -actin

S2C

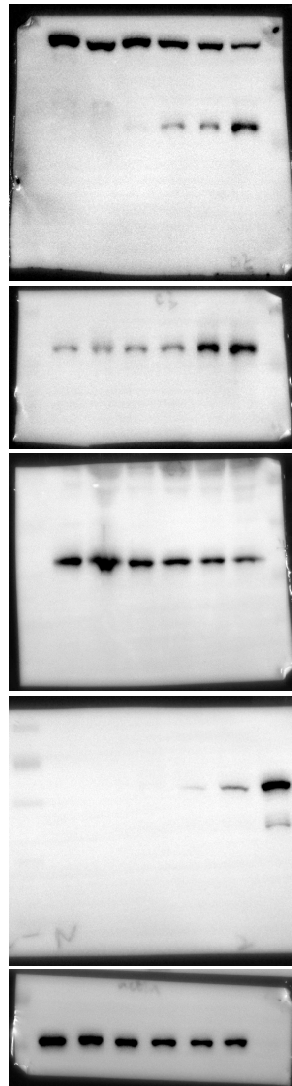

GSDME

Cleaved CASP3

CASP3

MV-N

$\beta$ -actin

S2D

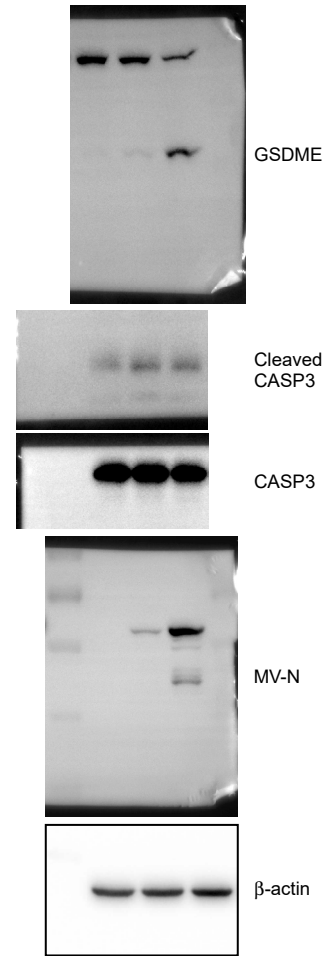

GSDME

Cleaved CASP3

CASP3

MV-N

$\beta$ -actin

Fig S3

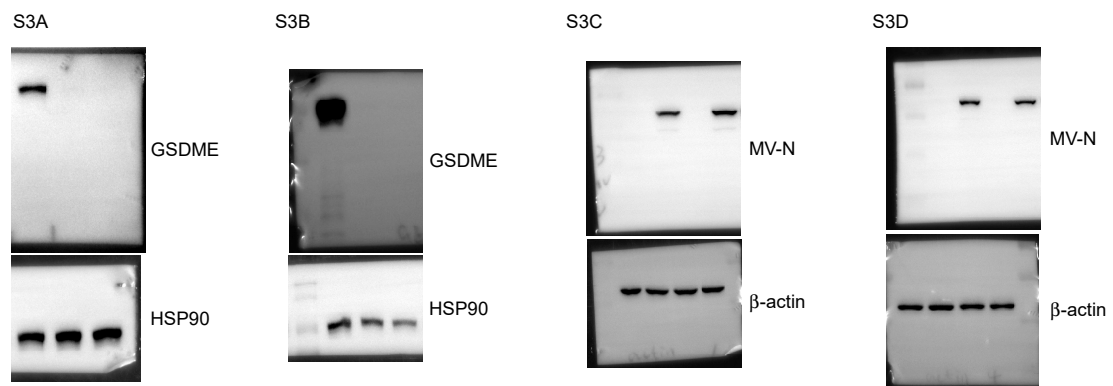



Fig S4

S4B

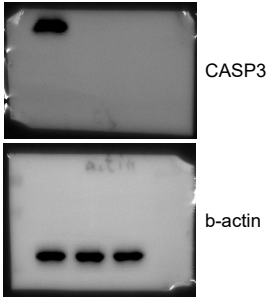

S4C

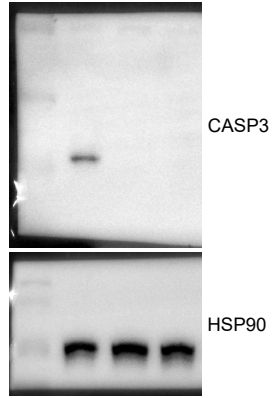

Fig S5

S5E

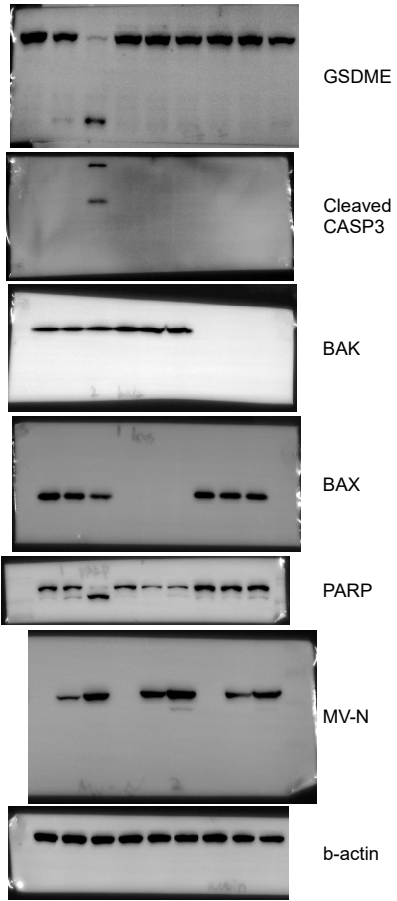

S5F

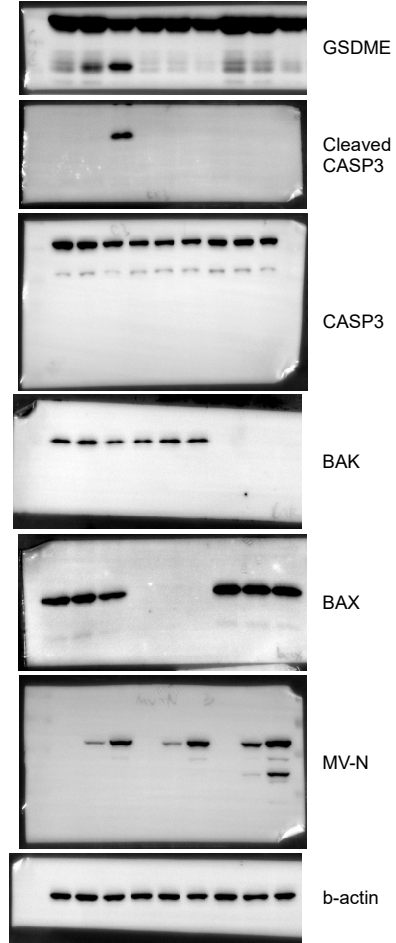

Supplement: 41420_2023_1466_MOESM4_ESM.pdf [file 41420_2023_1466_MOESM4_ESM.pdf]
